# Supplementary material for: P53 abnormalities and outcomes in colorectal cancer: a systematic review
Source: PubMed Central journal article supplement (PMC2362083; doi:10.1038/sj.bjc.6602358), 2005-01-25
Supplement: 92-6602358x1.pdf [file 92-6602358x1.pdf]

| id  | study       | pa | year | size with data | size overall | site       | method | endpoint      | context          | % with abnormal |          |           |           |
|-----|-------------|----|------|----------------|--------------|------------|--------|---------------|------------------|-----------------|----------|-----------|-----------|
|     |             |    |      |                |              |            |        |               |                  | p53             | antibody | criterion | from exon |
| 81  | adell       | p  | 1999 | 163            | 163          | rectum     | IHC    | local control | local preop      | 41% Pab-1801    | 0.05     | *****     |           |
| 82  | adell       | p  | 1999 | 85             | 85           | rectum     | IHC    | local control | local preop      | 45% Pab-1801    | 0.05     | *****     |           |
| 83  | adell       | p  | 1999 | 78             | 78           | rectum     | IHC    | local control | local preop      | 37% Pab-1801    | 0.05     | *****     |           |
| 44  | adrover     | p  | 1999 | 30             | 30           | colorectal | IHC    | survival      | post surg. adj.  | 33% DO-1        | 0.99     | *****     |           |
| 30  | ahnen       | p  | 1998 | 194            | 194          | colon      | IHC    | survival      | post surg. adj.  | 64% DO-7        | 0.05     | *****     |           |
| 26  | allegra     | p  | 2003 | 700            | 700          | colon      | IHC    | survival      | post surg. adj.  | 54% DO-7        | 0.1      | *****     |           |
| 20  | allegra     | p  | 2002 | 463            | 463          | colorectal | IHC    | survival      | post surg. adj.  | 60% DO-7        | 0.1      | *****     |           |
| 29  | allegra     | p  | 2003 | 700            | 700          | colon      | IHC    | FFS           | post surg. adj.  | 54% DO-7        | 0.1      | *****     |           |
| 84  | aoki        | p  | 2002 | 68             | 68           | colorectal | mut    | survival      | post surg. adj.  | 59% *****       | *****    |           | 5         |
| 41  | auvinenen   | p  | 1994 | 144            | 144          | colon      | IHC    | survival      | post surg. adj.  | 69% CM-1        | 0.2      | *****     |           |
| 64  | backus      | p  | 2001 | 29             | 29           | colorectal | IHC    | survival      | advanced / mets. | 21% DO-7        | 0.25     | *****     |           |
| 85  | backus      | p  | 2001 | 30             | 29           | colorectal | IHC    | response      | advanced / mets. | 21% DO-7        | 0.25     | *****     |           |
| 59  | baretton    | p  | 1996 | 95             | 95           | colorectal | IHC    | FFS           | post surg. adj.  | 42% DO-1        | 0.2      | *****     |           |
| 53  | bartik      | p  | 1997 | 82             | 257          | colorectal | IHC    | survival      | post surg. adj.  | 44% DO-1        | 0.05     | *****     |           |
| 86  | bell        | p  | 1993 | 100            | 100          | colorectal | IHC    | survival      | post surg. adj.  | 46% Pab421      | 0.01     | *****     |           |
| 78  | belluco     | p  | 1996 | 48             | 50           | colorectal | IHC    | survival      | advanced / mets. | 72% Pab-1801    | 0.1      | *****     |           |
| 87  | belluco     | p  | 1996 | 50             | 50           | colorectal | IHC    | response      | advanced / mets. | 72% Pab-1801    | 0.1      | *****     |           |
| 88  | benhattar   | p  | 1996 | 17             | 17           | colorectal | mut    | survival      | advanced / mets. | 47% *****       | *****    |           | 5         |
| 256 | berglund    | p  | 2002 | 120            | 136          | colorectal | IHC    | response      | advanced / mets. | 60% DO-7        | 0.05     | *****     |           |
| 89  | bhatavdekar | p  | 1997 | 48             | 48           | colorectal | IHC    | survival      | post surg. adj.  | 38% DO-7        | 0.05     | *****     |           |
| 90  | bleeker     | p  | 2001 | 55             | 55           | colon      | mut    | survival      | post surg. adj.  | 44% *****       | *****    |           | 5         |
| 91  | borreson-d  | p  | 1998 | 222            | 222          | colorectal | mut    | survival      | post surg. adj.  | 46% *****       | *****    |           | 5         |
| 92  | bosari      | p  | 1995 | 126            | 126          | colorectal | mut    | survival      | post surg. adj.  | 59% *****       | *****    |           | 5         |
| 93  | bosari      | p  | 1994 | 206            | 206          | colorectal | IHC    | survival      | post surg. adj.  | 46% Pab-1801    | 0.01     | *****     |           |
| 94  | bouzouren   | p  | 2000 | 122            | 122          | colorectal | mut    | survival      | post surg. adj.  | 32% *****       | *****    |           | 5         |
| 46  | bouzouren   | p  | 2000 | 112            | 122          | colorectal | IHC    | survival      | post surg. adj.  | 47% DO-7        | 0.1      | *****     |           |
| 95  | brett       | p  | 1996 | 59             | 59           | colorectal | IHC    | response      | advanced / mets. | 49% DO-1        | 0.05     | *****     |           |
| 77  | buglioni    | p  | 2001 | 94             | 94           | colorectal | IHC    | survival      | post surg. adj.  | 53% DO-7        | 0.01     | *****     |           |
| 96  | buglioni    | p  | 1999 | 141            | 171          | colorectal | IHC    | survival      | post surg. adj.  | 72% DO-7        | 0.01     | *****     |           |
| 76  | buglioni    | p  | 2001 | 94             | 94           | colorectal | IHC    | FFS           | post surg. adj.  | 53% DO-7        | 0.01     | *****     |           |
| 80  | buglioni    | p  | 1999 | 119            | 171          | colorectal | IHC    | FFS           | post surg. adj.  | 72% DO-7        | 0.01     | *****     |           |
| 98  | bukholm     | p  | 2000 | 93             | 93           | colon      | IHC    | survival      | post surg. adj.  | 60% DO-1        | 0.1      | *****     |           |

| id | study           | pa | year | size with | size    | site       | method | endpoint   | context          | % with |          | criterion | from exon |
|----|-----------------|----|------|-----------|---------|------------|--------|------------|------------------|--------|----------|-----------|-----------|
|    |                 |    |      | data      | overall |            |        |            |                  | p53    | antibody |           |           |
|    | 97 bukholm      | p  | 2000 | 93        | 93      | colon      | IHC    | metastases | post surg. adj.  | 60%    | DO-1     | 0.1       | *****     |
|    | 60 caldes       | p  | 1998 | 72        | 72      | colorectal | mut    | survival   | post surg. adj.  | 26%    | *****    | *****     | 5         |
|    | 43 caldes       | p  | 1998 | 72        | 72      | colorectal | IHC    | survival   | post surg. adj.  | 56%    | DO-7     | *****     | *****     |
|    | 99 cascinu      | p  | 2000 | 41        | 41      | colorectal | IHC    | response   | advanced / mets. | 66%    | 53-12    | 0.2       | *****     |
|    | 48 cascinu      | p  | 2002 | 79        | 79      | rectum     | IHC    | FFS        | post surg. adj.  | 46%    | DO-7     | 0.1       | *****     |
|    | 100 chen        | p  | 1997 | 70        | 70      | colorectal | IHC    | FFS        | post surg. adj.  | 69%    | Pab-1801 | 0.01      | *****     |
|    | 101 chen        | p  | 1997 | 45        | 45      | colorectal | IHC    | FFS        | post surg. adj.  | 69%    | Pab-1801 | 0.01      | *****     |
|    | 102 chen        | p  | 1997 | 25        | 25      | colorectal | IHC    | FFS        | post surg. adj.  | 68%    | Pab-1801 | 0.01      | *****     |
|    | 103 clarke      | p  | 1999 | 134       | 134     | colorectal | IHC    | survival   | post surg. adj.  | 58%    | DO-7     | 0.01      | *****     |
|    | 257 costa       | p  | 1997 | 104       | 104     | colorectal | IHC    | FFS        | advanced / mets. | 59%    | Pab-1801 | 0.05      | *****     |
|    | 105 desai       | p  | 1996 | 23        | 23      | rectum     | IHC    | FFS        | local preop      | 43%    | Pab-1801 | *****     | *****     |
|    | 104 desai       | p  | 1996 | 20        | 23      | rectum     | IHC    | response   | local preop      | 43%    | Pab-1801 | *****     | *****     |
|    | 108 diez        | p  | 1997 | 37        | 37      | rectum     | IHC    | FFS        | local preop      | 65%    | CM-1     | 0.01      | *****     |
|    | 109 diez        | p  | 1997 | 30        | 37      | rectum     | IHC    | FFS        | local preop      | 65%    | CM-1     | 0.01      | *****     |
|    | 107 diez        | p  |      | 130       | 130     | rectum     | IHC    | FFS        | post surg. adj.  | 58%    | CM-1     | 0.1       | *****     |
|    | 65 diez         | p  |      | 190       | 190     | colorectal | IHC    | FFS        | post surg. adj.  | 53%    | CM-1     | 0.1       | *****     |
|    | 69 diez         | p  | 2000 | 174       | 174     | colorectal | IHC    | FFS        | post surg. adj.  | 47%    | CM-1     | 0.01      | *****     |
|    | 74 diez         | p  | 1995 | 61        | 61      | colorectal | IHC    | FFS        | post surg. adj.  | 44%    | CM-1     | 0.01      | *****     |
|    | 106 diez        | p  |      | 60        | 60      | colon      | IHC    | FFS        | post surg. adj.  | 42%    | CM-1     | 0.1       | *****     |
|    | 110 dominguez   | a  | 1994 | 73        | 73      | colorectal | IHC    | survival   | post surg. adj.  | 49%    | DO-7     | 0.99      | *****     |
|    | 112 edler       | p  | 2000 | 109       | 109     | rectum     | IHC    | survival   | local preop      | 69%    | DO-7     | 0.05      | *****     |
|    | 111 edler       | p  | 2000 | 109       | 109     | rectum     | IHC    | metastases | local preop      | 69%    | DO-7     | 0.05      | *****     |
|    | 114 elsaleh     | p  | 2000 | 48        | 48      | rectum     | mut    | response   | local preop      | 35%    | *****    | *****     | 5         |
|    | 115 elsaleh     | p  | 2000 | 48        | 48      | rectum     | other  | response   | local preop      | 46%    | *****    | *****     | *****     |
|    | 15 elsaleh      | p  | 1999 | 122       | 122     | rectum     | mut    | survival   | post surg. adj.  | 39%    | *****    | *****     | 5         |
|    | 113 elsaleh     | p  | 2000 | 48        | 48      | rectum     | IHC    | response   | local preop      | 40%    | DO-7     | 0.05      | *****     |
|    | 17 elsaleh      | p  | 1999 | 118       | 122     | rectum     | IHC    | survival   | post surg. adj.  | 39%    | DO-7     | 0.05      | *****     |
|    | 116 esposito    | p  | 2001 | 38        | 38      | rectum     | IHC    | response   | local preop      | 45%    | Pab-1801 | 0.1       | *****     |
|    | 66 etienne      | p  | 2002 | 97        | 97      | colorectal | mut    | survival   | advanced / mets. | 57%    | *****    | *****     | 4         |
|    | 117 fante       | p  | 1996 | 150       | 150     | colorectal | IHC    | survival   | post surg. adj.  | 47%    | Pab-1801 | 0.01      | *****     |
|    | 242 finkelstein | p  | 1996 | 204       | 204     | colorectal | mut    | survival   | post surg. adj.  | 67%    | *****    | *****     | 5         |
|    | 118 flamini     | p  | 1996 | 94        | 94      | colorectal | IHC    | FFS        | post surg. adj.  | 48%    | DO-7     | 0.01      | *****     |

| id  | study      | pa | year | size with | size    | site       | method | endpoint      | context          | % with |          |           |           |
|-----|------------|----|------|-----------|---------|------------|--------|---------------|------------------|--------|----------|-----------|-----------|
|     |            |    |      | data      | overall |            |        |               |                  | p53    | antibody | criterion | from exon |
| 248 | fraczadi   | p  | 2003 | 20        | 20      | rectum     | other  | survival      | local preop      |        | other    | 99        | *****     |
| 120 | fu         | p  | 1998 | 46        | 46      | rectum     | IHC    | survival      | local preop      | 48%    | DO-7     | 0.05      | *****     |
| 119 | fu         | p  | 1998 | 49        | 49      | rectum     | IHC    | response      | local preop      | 49%    | DO-7     | 0.05      | *****     |
| 121 | gallego    | p  | 2000 | 126       | 126     | rectum     | IHC    | survival      | local preop      | 67%    | DO-7     | 0.01      | *****     |
| 122 | gallego    | p  | 2000 | 126       | 126     | rectum     | IHC    | survival      | post surg. adj.  | 67%    | DO-7     | 0.01      | *****     |
| 255 | garrity    | p  | 2004 | 365       | 1388    | colon      | IHC    | FFS           | post surg. adj.  | 76%    | DO-7     | 0.99      | *****     |
| 254 | garrity    | p  | 2004 | 365       | 1388    | colon      | IHC    | survival      | post surg. adj.  | 76%    | DO-7     | 0.99      | *****     |
| 123 | gervaz     | p  | 2001 | 122       | 122     | colorectal | mut    | survival      | post surg. adj.  | 32%    | *****    | *****     | 5         |
| 47  | gervaz     | p  | 2001 | 154       | 122     | colorectal | IHC    | survival      | post surg. adj.  | 47%    | DO-7     | 0.1       | *****     |
| 70  | gervaz     | p  | 2002 | 88        | 88      | colorectal | IHC    | survival      | post surg. adj.  | 44%    | DO-7     | 0.1       | *****     |
| 129 | giatromanc | p  | 1999 | 106       | 106     | colorectal | IHC    | survival      | post surg. adj.  | 44%    | DO-7     | 0.1       | *****     |
| 126 | giatromanc | p  | 2001 | 268       | 268     | colorectal | IHC    | FFS           | post surg. adj.  | 46%    | DO-7     | 0.05      | *****     |
| 128 | giatromanc | p  | 1999 | 108       | 106     | colorectal | IHC    | FFS           | post surg. adj.  | 44%    | DO-7     | 0.1       | *****     |
| 127 | giatromanc | p  | 2001 | 70        | 70      | rectum     | IHC    | FFS           | post surg. adj.  | 29%    | DO-7     | 0.05      | *****     |
| 124 | giatromanc | p  | 2001 | 268       | 268     | colorectal | IHC    | local control | post surg. adj.  | 46%    | DO-7     | 0.05      | *****     |
| 125 | giatromanc | p  | 2001 | 70        | 70      | rectum     | IHC    | local control | post surg. adj.  | 29%    | DO-7     | 0.05      | *****     |
| 131 | goh        | p  | 1999 | 130       | 130     | rectum     | mut    | survival      | post surg. adj.  | 55%    | *****    | *****     | 4         |
| 132 | goh        | p  | 1999 | 198       | 198     | colon      | mut    | survival      | post surg. adj.  | 47%    | *****    | *****     | 4         |
| 130 | goh        | p  | 1999 | 328       | 328     | colorectal | mut    | metastases    | post surg. adj.  | 51%    | *****    | *****     | 4         |
| 241 | gonzalez-a | p  | 2004 | 77        | 96      | colorectal | mut    | FFS           | post surg. adj.  | 39%    | *****    | *****     |           |
| 134 | grewal     | p  | 1995 | 66        | 66      | colorectal | IHC    | survival      | post surg. adj.  | 52%    | Pab-1801 | 0.01      | *****     |
| 133 | grewal     | p  | 1995 | 66        | 66      | colorectal | IHC    | local control | post surg. adj.  | 52%    | Pab-1801 | 0.01      | *****     |
| 16  | gunther    | p  | 2002 | 115       | 115     | rectum     | IHC    | metastases    | post surg. adj.  | 58%    | DO-1     | 0.1       | *****     |
| 135 | hallak     | p  | 1998 | 119       | 120     | colorectal | IHC    | metastases    | post surg. adj.  | 55%    | DO-1     | 0.99      | *****     |
| 51  | hamelin    | p  | 1994 | 85        | 85      | colorectal | mut    | survival      | post surg. adj.  | 52%    | *****    | *****     | 5         |
| 42  | hardinghan | p  | 1998 | 100       | 100     | colorectal | mut    | survival      | post surg. adj.  | 55%    | *****    | *****     | 5         |
| 71  | haseba     | p  | 2003 | 73        | 79      | colorectal | mut    | FFS           | post surg. adj.  | 71%    | *****    | *****     | 5         |
| 136 | hayashi    | p  | 1995 | 61        | 61      | colorectal | mut    | survival      | post surg. adj.  | 20%    | *****    | *****     | 5         |
| 137 | heisterkam | p  | 1999 | 45        | 45      | colorectal | IHC    | FFS           | advanced / mets. | 53%    | DO-7     | 0.1       | *****     |
| 138 | hirano     | p  | 2000 | 71        | 71      | colorectal | IHC    | metastases    | post surg. adj.  | 35%    | CM-1     | 0.3       | *****     |
| 140 | hirvikoski | p  | 1999 | 98        | 98      | rectum     | mut    | survival      | post surg. adj.  | 39%    | *****    | *****     | 4         |
| 24  | hirvikoski | p  | 1999 | 96        | 96      | rectum     | IHC    | survival      | post surg. adj.  | 54%    | CM-1     | 0.2       | *****     |

| id  | study      | pa | year | size with data | size overall | site       | method | endpoint      | context          | % with abnormal |          |           |           |
|-----|------------|----|------|----------------|--------------|------------|--------|---------------|------------------|-----------------|----------|-----------|-----------|
|     |            |    |      |                |              |            |        |               |                  | p53             | antibody | criterion | from exon |
| 139 | hirvikoski | p  | 1999 | 97             | 97           | rectum     | IHC    | survival      | post surg. adj.  | 71% DO-7        | 0.2      | *****     |           |
| 141 | ichikawa   | p  | 1996 | 15             | 15           | rectum     | mut    | response      | local preop      | 53% *****       | *****    |           | 5         |
| 142 | ilyas      | p  | 1998 | 66             | 66           | colorectal | IHC    | FFS           | post surg. adj.  | 56% DO-7        | 0.1      | *****     |           |
| 68  | iniesta    | p  | 1998 | 37             | 61           | colorectal | mut    | survival      | post surg. adj.  | 30% *****       | *****    |           | 5         |
| 143 | jansson    | p  | 2001 | 75             | 75           | colorectal | mut    | survival      | post surg. adj.  | 55% *****       | *****    |           | 5         |
| 144 | jingwei    | a  | 1998 | 40             | 40           | colorectal | IHC    | survival      | post surg. adj.  | 50% DO-7        | 0.99     | *****     |           |
| 145 | kahlenberg | p  | 2000 | 56             | 56           | colorectal | mut    | survival      | post surg. adj.  | 50% *****       | *****    |           | 5         |
| 22  | kahlenberg | p  | 2000 | 56             | 56           | colorectal | mut    | FFS           | post surg. adj.  | 50% *****       | *****    |           | 5         |
| 149 | kandolier  | p  | 2002 | 64             | 64           | rectum     | mut    | survival      | local preop      | 45% *****       | *****    |           | 2         |
| 148 | kandolier  | p  | 2002 | 64             | 64           | rectum     | mut    | local control | local preop      | 45% *****       | *****    |           | 2         |
| 147 | kandolier  | p  | 2002 | 64             | 64           | rectum     | mut    | response      | local preop      | 45% *****       | *****    |           | 2         |
| 146 | kandolier  | p  | 2002 | 64             | 64           | rectum     | mut    | metastases    | local preop      | 45% *****       | *****    |           | 2         |
| 151 | kang       | p  | 1997 | 163            | 163          | colorectal | IHC    | survival      | post surg. adj.  | 42% DO-7        | 0.1      | *****     |           |
| 150 | kang       | p  | 1997 | 101            | 101          | colorectal | IHC    | FFS           | post surg. adj.  | 40% DO-7        | 0.1      | *****     |           |
| 152 | kapiteijn  | p  | 2001 | 39             | 39           | rectum     | IHC    | survival      | post surg. adj.  | 64% DO-7        | 0.25     | *****     |           |
| 153 | kapiteijn  | p  | 2001 | 34             | 34           | colon      | IHC    | survival      | post surg. adj.  | 29% DO-7        | 0.25     | *****     |           |
| 154 | khan       | p  | 2001 | 27             | 27           | colorectal | mut    | response      | advanced / mets. | 78% *****       | *****    |           | 4         |
| 155 | kim        | p  | 2001 | 23             | 23           | rectum     | IHC    | response      | local preop      | 70% DO-7        | 0.1      | *****     |           |
| 156 | kim        | p  | 1995 | 387            | 471          | colorectal | IHC    | survival      | post surg. adj.  | 45% DO-7        | 0.01     | *****     |           |
| 10  | klump      | p  | 2003 | 125            | 125          | colon      | IHC    | survival      | post surg. adj.  | 46% DO-1        | 0.05     | *****     |           |
| 11  | klump      | p  | 2003 | 133            | 133          | colon      | IHC    | survival      | post surg. adj.  | 41% DO-1        | 0.05     | *****     |           |
| 12  | klump      | p  | 2003 | 113            | 113          | colon      | IHC    | survival      | post surg. adj.  | 39% DO-1        | 0.05     | *****     |           |
| 158 | kotera     | p  | 1997 | 58             | 58           | rectum     | IHC    | survival      | local preop      | 31% rsp53       | 0.01     | *****     |           |
| 157 | kotera     | p  | 1997 | 58             | 58           | rectum     | IHC    | local control | local preop      | 31% rsp53       | 0.01     | *****     |           |
| 34  | kressner   | p  | 1999 | 186            | 186          | colorectal | mut    | survival      | post surg. adj.  | 53% *****       | *****    |           | 1         |
| 21  | kressner   | p  | 1999 | 192            | 186          | colorectal | IHC    | survival      | local preop      | 53% DO-7        |          | *****     |           |
| 160 | kressner   | p  | 1996 | 260            | 260          | colorectal | IHC    | survival      | post surg. adj.  | 54% DO-7        | 0.01     | *****     |           |
| 159 | kressner   | p  | 1996 | 294            | 294          | colorectal | IHC    | FFS           | post surg. adj.  | 55% DO-7        | 0.01     | *****     |           |
| 161 | lanza      | p  | 1996 | 141            | 204          | colorectal | IHC    | survival      | post surg. adj.  | 61% DO-7        | 0.05     | *****     |           |
| 7   | lashner    | p  | 2003 | 75             | 75           | colorectal | IHC    | survival      | post surg. adj.  | 51% DO-7        | 0.05     | *****     |           |
| 162 | lazaris    | p  | 1995 | 60             | 60           | colorectal | IHC    | survival      | post surg. adj.  | 47% Pab-1801    | 0.1      | *****     |           |
| 164 | leahy      | p  | 1996 | 66             | 66           | colorectal | mut    | survival      | post surg. adj.  | 41% *****       | *****    |           | 5         |

| id  | study       | pa | year | size with | size    | site       | method | endpoint      | context          | % with |          | criterion | from exon |
|-----|-------------|----|------|-----------|---------|------------|--------|---------------|------------------|--------|----------|-----------|-----------|
|     |             |    |      | data      | overall |            |        |               |                  | p53    | antibody |           |           |
| 163 | leahy       | p  | 1996 | 70        | 66      | colorectal | IHC    | survival      | post surg. adj.  | 47%    | DO-7     | 0.1       | *****     |
| 244 | lenz        | p  |      | 36        | 36      | colorectal | mut    | survival      | advanced / mets. | 72%    | *****    | *****     | 4         |
| 79  | lenz        | p  | 1998 | 45        | 45      | colon      | IHC    | survival      | post surg. adj.  | 60%    | DO-7     | 0.1       | *****     |
| 75  | lenz        | p  | 1998 | 45        | 45      | colon      | IHC    | FFS           | post surg. adj.  | 60%    | DO-7     | 0.1       | *****     |
| 166 | liang       | p  | 1999 | 166       | 166     | rectum     | mut    | FFS           | post surg. adj.  | 54%    | *****    | *****     | 2         |
| 165 | liang       | p  | 1999 | 0         | 166     | rectum     | IHC    | FFS           | post surg. adj.  | 50%    | DO-1     | 0.1       | *****     |
| 168 | luna-perez  | p  | 1998 | 26        | 26      | rectum     | IHC    | response      | local preop      | 54%    | Pab-1801 | 0.1       | *****     |
| 31  | maeda       | p  | 1997 | 101       | 101     | colorectal | IHC    | FFS           | post surg. adj.  | 39%    | DO-7     | 0.01      | *****     |
| 54  | manne       | p  | 1997 | 131       | 131     | colorectal | IHC    | survival      | post surg. adj.  | 45%    | 53-12    | 0.1       | *****     |
| 169 | manne       | p  | 1998 | 504       | 504     | colorectal | IHC    | survival      | post surg. adj.  | 52%    | 53-12    | 0.1       | *****     |
| 170 | morrin      | p  | 1994 | 52        | 52      | colorectal | IHC    | survival      | post surg. adj.  | 62%    | DO-7     | 0.99      | *****     |
| 171 | mulder      | p  | 1995 | 109       | 109     | colorectal | IHC    | survival      | post surg. adj.  | 39%    | DO-7     | 0.3       | *****     |
| 172 | nasierowski | p  | 2001 | 27        | 204     | rectum     | IHC    | response      | local preop      | 48%    | DO-7     | 0.1       | *****     |
| 173 | nathanson   | p  | 1994 | 84        | 84      | colorectal | IHC    | survival      | post surg. adj.  | 62%    | Pab-1801 | 0.01      | *****     |
| 174 | nehls       | p  | 1999 | 100       | 100     | rectum     | IHC    | FFS           | local preop      | 55%    | DO-1     | 0.05      | *****     |
| 58  | nitti       | p  | 1998 | 69        | 69      | colorectal | IHC    | survival      | advanced / mets. | 64%    | DO-1     | 0.1       | *****     |
| 175 | offner      | p  | 1995 | 109       | 109     | colorectal | IHC    | survival      | post surg. adj.  | 55%    | CM-1     | 0.01      | *****     |
| 177 | ogiwara     | p  | 1994 | 39        | 39      | rectum     | IHC    | survival      | post surg. adj.  | 36%    | DO-7     | 0.99      | *****     |
| 176 | ogiwara     | p  | 1994 | 39        | 39      | rectum     | IHC    | local control | post surg. adj.  | 36%    | DO-7     | 0.99      | *****     |
| 178 | okonkwo     | p  | 2001 | 25        | 25      | rectum     | IHC    | response      | local preop      | 40%    | DO-7     | 0.1       | *****     |
| 180 | okubo       | p  | 2001 | 110       | 110     | colorectal | mut    | survival      | post surg. adj.  | 37%    | *****    | *****     | 2         |
| 179 | okubo       | p  | 2001 | 110       | 110     | colorectal | IHC    | survival      | post surg. adj.  | 44%    | DO-7     | 0.2       | *****     |
| 182 | paradiso    | p  | 2002 | 75        | 80      | colorectal | IHC    | survival      | advanced / mets. | 43%    | Pab-1801 | 0.05      | *****     |
| 181 | paradiso    | p  | 2002 | 75        | 80      | colorectal | IHC    | response      | advanced / mets. | 43%    | Pab-1801 | 0.05      | *****     |
| 23  | paradiso    | p  | 2000 | 108       | 108     | colorectal | IHC    | response      | advanced / mets. | 37%    | Pab-1801 | 0.05      | *****     |
| 183 | pereira     | p  | 1997 | 80        | 80      | colorectal | IHC    | survival      | post surg. adj.  | 30%    | DO-7     | 0.1       | *****     |
| 184 | pocard      | c  | 1998 | 21        | 21      | colorectal | IHC    | FFS           | advanced / mets. | 62%    | DO-7     | 0.05      | *****     |
| 186 | poller      | p  | 1997 | 250       | 250     | colorectal | IHC    | survival      | post surg. adj.  | 61%    | DO-1     | 0.01      | *****     |
| 185 | poller      | p  | 1997 | 250       | 250     | colorectal | IHC    | local control | post surg. adj.  | 61%    | DO-1     | 0.01      | *****     |
| 187 | pricolo     | p  | 1996 | 70        | 70      | colon      | mut    | survival      | post surg. adj.  | 61%    | *****    | *****     | 5         |
| 62  | pricolo     | p  | 1997 | 141       | 141     | colon      | mut    | survival      | post surg. adj.  | 61%    | *****    | *****     | 5         |
| 190 | qiu         | p  | 2000 | 72        | 72      | rectum     | IHC    | survival      | local preop      | 69%    | DO-7     | *****     | *****     |

| id  | study | pa         | year | size with data | size overall | site   | method     | endpoint | context       | % with abnormal |          |           | from exon |
|-----|-------|------------|------|----------------|--------------|--------|------------|----------|---------------|-----------------|----------|-----------|-----------|
|     |       |            |      |                |              |        |            |          |               | p53             | antibody | criterion |           |
| 189 | qiu   | p          | 2000 | 72             | 72           | rectum | IHC        | FFS      | local preop   | 69%             | DO-7     |           | *****     |
| 188 | qiu   | p          | 2000 | 72             | 72           | rectum | IHC        | response | local preop   | 69%             | DO-7     |           | *****     |
|     | 9     | rau        | p    | 2003           | 51           | 66     | rectum     | mut      | survival      | 16%             | *****    | *****     | 5         |
|     | 8     | rau        | p    | 2003           | 65           | 66     | rectum     | IHC      | survival      | 43%             | DO-7     |           | *****     |
|     | 57    | rebischung | p    | 2002           | 86           | 86     | rectum     | mut      | survival      | 51%             | *****    | *****     | 2         |
|     | 191   | rebischung | p    | 2002           | 86           | 86     | rectum     | mut      | response      | 51%             | *****    | *****     | 2         |
|     | 193   | remvikos   | p    | 1992           | 78           | 78     | colorectal | IHC      | survival      | 67%             | multiple | 0.99      | *****     |
|     | 192   | remvikos   | p    | 1992           | 78           | 78     | colorectal | IHC      | FFS           | 67%             | multiple | 0.99      | *****     |
|     | 35    | rew        | p    | 1996           | 82           | 82     | colorectal | IHC      | survival      | 50%             | Pab-1801 | 0.99      | *****     |
|     | 197   | rodel      | p    | 2002           | 39           | 44     | rectum     | IHC      | FFS           | 45%             | DO-7     | 0.1       | *****     |
|     | 198   | rodel      | p    | 2002           | 54           | 54     | rectum     | IHC      | FFS           | 46%             | DO-7     | 0.1       | *****     |
|     | 196   | rodel      | p    | 2002           | 54           | 54     | rectum     | IHC      | local control | 46%             | DO-7     | 0.1       | *****     |
|     | 195   | rodel      | p    | 2002           | 42           | 44     | rectum     | IHC      | response      | 45%             | DO-7     | 0.1       | *****     |
|     | 194   | rodel      | p    | 2002           | 54           | 54     | rectum     | IHC      | metastases    | 46%             | DO-7     | 0.1       | *****     |
|     | 200   | rosty      | p    | 2001           | 49           | 56     | colorectal | mut      | survival      | 63%             | *****    | *****     | 4         |
|     | 199   | rosty      | p    | 2001           | 56           | 56     | colorectal | mut      | response      | 63%             | *****    | *****     | 4         |
|     | 52    | russo      | p    | 2002           | 160          | 160    | colorectal | mut      | survival      | 43%             | *****    | *****     | 5         |
|     | 45    | russo      | p    | 2002           | 160          | 160    | colorectal | mut      | FFS           | 43%             | *****    | *****     | 5         |
|     | 201   | russo      | p    | 1998           | 35           | 35     | colorectal | mut      | survival      | 43%             | *****    | *****     | 5         |
|     | 202   | sakakura   | p    | 1998           | 28           | 28     | rectum     | mut      | response      | 50%             | *****    | *****     | 4         |
|     | 25    | samowitz   | p    | 2002           | 1462         | 1464   | colon      | mut      | survival      | 45%             | *****    | *****     | 5         |
|     | 2     | saw        | p    | 2003           | 60           | 78     | rectum     | mut      | local control | 55%             | *****    | *****     | 5         |
|     | 5     | saw        | p    | 2003           | 60           | 78     | rectum     | mut      | response      | 55%             | *****    | *****     | 5         |
|     | 204   | saw        | p    | 2002           | 60           | 60     | colorectal | mut      | survival      | 58%             | *****    | *****     | 5         |
|     | 3     | saw        | p    | 2003           | 60           | 78     | rectum     | IHC      | survival      | 55%             | DO-7     | 0.01      | *****     |
|     | 1     | saw        | p    | 2003           | 60           | 78     | rectum     | IHC      | local control | 55%             | DO-7     | 0.01      | *****     |
|     | 4     | saw        | p    | 2003           | 60           | 78     | rectum     | IHC      | response      | 55%             | DO-7     | 0.01      | *****     |
|     | 203   | saw        | p    | 2002           | 63           | 63     | colorectal | IHC      | survival      | 44%             | DO-7     | 0.05      | *****     |
|     | 40    | schelwies  | p    | 2002           | 76           | 59     | colorectal | mut      | survival      | 47%             | *****    | *****     | 5         |
|     | 205   | schelwies  | p    | 2002           | 57           | 57     | colorectal | mut      | survival      | 32%             | *****    | *****     | 5         |
|     | 206   | schwandnep | p    | 2002           | 160          | 160    | rectum     | IHC      | survival      | 39%             | DO-1     | 0.1       | *****     |
|     | 208   | schwandnep | p    | 2000           | 160          | 160    | rectum     | IHC      | survival      | 39%             | DO-1     | 0.1       | *****     |

| id  | study      | pa | year | size with | size    | site       | method | endpoint      | context          | % with |          |           | from exon |
|-----|------------|----|------|-----------|---------|------------|--------|---------------|------------------|--------|----------|-----------|-----------|
|     |            |    |      | data      | overall |            |        |               |                  | p53    | antibody | criterion |           |
| 73  | schwandnep | p  | 2002 | 160       | 160     | rectum     | IHC    | FFS           | post surg. adj.  | 39%    | DO-1     | 0.1       | *****     |
| 207 | schwandnep | p  | 2000 | 160       | 160     | rectum     | IHC    | FFS           | post surg. adj.  | 39%    | DO-1     | 0.1       | *****     |
| 210 | scott      | p  | 1991 | 52        | 52      | colorectal | IHC    | survival      | post surg. adj.  | 42%    | Pab421   | 0.7       | *****     |
| 209 | scott      | p  | 1998 | 22        | 22      | rectum     | IHC    | response      | local preop      | 59%    | DO-7     | 0.33      | *****     |
| 213 | smith      | p  | 1996 | 100       | 100     | colorectal | mut    | survival      | post surg. adj.  | 51%    | *****    | *****     |           |
| 211 | smith      | p  | 1996 | 100       | 100     | colorectal | IHC    | survival      | post surg. adj.  | 62%    | Pab-1801 | 0.01      | *****     |
| 212 | smith      | p  | 1996 | 100       | 100     | colorectal | IHC    | survival      | post surg. adj.  | 76%    | Pab240   | 0.01      | *****     |
| 246 | smith      | p  | 2003 | 24        | 24      | colorectal | IHC    | survival      | post surg. adj.  |        | DO-1     | 0.99      | *****     |
| 247 | smith      | p  | 2003 | 24        | 24      | colorectal | IHC    | survival      | post surg. adj.  |        | DO-1     | 0.1       | *****     |
| 18  | soong      | p  | 1997 | 541       | 541     | colorectal | mut    | survival      | post surg. adj.  | 36%    | *****    | *****     | 5         |
| 19  | soong      | p  | 2000 | 948       | 948     | colorectal | mut    | survival      | post surg. adj.  | 38%    | *****    | *****     | 4         |
| 14  | soong      | p  | 1997 | 541       | 541     | colorectal | IHC    | survival      | post surg. adj.  | 30%    | DO-7     | 0.05      | *****     |
| 214 | sory       | p  | 1997 | 50        | 50      | colorectal | IHC    | metastases    | post surg. adj.  | 40%    | rsp53    | 0.33      | *****     |
| 215 | spitz      | p  | 1997 | 42        | 42      | rectum     | IHC    | response      | local preop      | 55%    | DO-1     | 0.1       | *****     |
| 217 | starzynska | p  | 1997 | 102       | 102     | colorectal | IHC    | survival      | post surg. adj.  | 46%    | CM-1     | 0.01      | *****     |
| 219 | starzynska | p  | 1992 | 80        | 107     | colorectal | IHC    | survival      | post surg. adj.  | 46%    | CM-1     | 0.01      | *****     |
| 216 | starzynska | p  | 1997 | 102       | 102     | colorectal | IHC    | FFS           | post surg. adj.  | 46%    | CM-1     | 0.01      | *****     |
| 218 | starzynska | p  | 1992 | 80        | 107     | colorectal | IHC    | FFS           | post surg. adj.  | 46%    | CM-1     | 0.01      | *****     |
| 13  | sturm      | p  | 1999 | 40        | 40      | colorectal | mut    | survival      | advanced / mets. | 35%    | *****    | *****     | 8         |
| 220 | sturm      | p  | 1999 | 40        | 40      | colorectal | IHC    | survival      | advanced / mets. | 60%    | DO-7     | 0.1       | *****     |
| 221 | subramani  | p  | 1995 | 56        | 56      | rectum     | IHC    | local control | post surg. adj.  | 46%    | CM-1     | 0.01      | *****     |
| 32  | sun        | p  | 1993 | 238       | 238     | colorectal | IHC    | survival      | post surg. adj.  | 39%    | CM-1     | 0.01      | *****     |
| 55  | sun        | p  | 1995 | 238       | 238     | colorectal | IHC    | survival      | post surg. adj.  |        | CM-1     | 0.01      | *****     |
| 222 | sun        | p  | 1997 | 256       | 256     | colorectal | IHC    | survival      | post surg. adj.  | 23%    | CM-1     | 0.05      | *****     |
| 223 | sun        | p  | 1996 | 104       | 293     | colorectal | IHC    | survival      | post surg. adj.  | 38%    | CM-1     | 0.01      | *****     |
| 224 | suzuki     | p  | 1994 | 67        | 67      | colorectal | IHC    | FFS           | post surg. adj.  | 51%    | Pab-1801 | 0.01      | *****     |
| 225 | tollenaar  | p  | 1998 | 238       | 238     | colorectal | IHC    | survival      | post surg. adj.  | 40%    | DO-7     | 0.3       | *****     |
| 243 | tomoda     | p  | 1995 | 144       | 144     | colorectal | IHC    | FFS           | post surg. adj.  | 25%    | CM-1     | 0.99      | *****     |
| 56  | tortola    | p  | 1999 | 132       | 151     | colorectal | mut    | survival      | post surg. adj.  | 50%    | *****    | *****     | 4         |
| 226 | tullo      | p  | 1999 | 40        | 40      | colorectal | mut    | FFS           | advanced / mets. | 45%    | *****    | *****     | 5         |
| 227 | wang       | a  | 1998 | 40        | 40      | colorectal | IHC    | survival      | post surg. adj.  | 65%    | other    | 0.99      | *****     |
| 228 | watanabe   | p  | 2002 | 78        | 78      | rectum     | IHC    | survival      | local preop      | 38%    | DO-7     | 0.4       | *****     |

| id  | study       | pa | year | size with<br>data | size<br>overall | site       | method | endpoint      | context          | % with<br>abnormal |          |           |           |
|-----|-------------|----|------|-------------------|-----------------|------------|--------|---------------|------------------|--------------------|----------|-----------|-----------|
|     |             |    |      |                   |                 |            |        |               |                  | p53                | antibody | criterion | from exon |
| 229 | wiggenraacp |    | 1998 | 123               | 123             | rectum     | IHC    | survival      | post surg. adj.  | 48% DO-7           |          | 0.1       | *****     |
| 36  | wiggenraacp |    | 1998 | 123               | 123             | rectum     | IHC    | local control | post surg. adj.  | 48% DO-7           |          | 0.1       | *****     |
| 230 | yamaguchi p |    | 1993 | 203               | 203             | colorectal | IHC    | survival      | post surg. adj.  | 60% Pab-1801       |          | 0.01      | *****     |
| 232 | yamaguchi p |    | 1992 | 100               | 100             | colorectal | IHC    | survival      | post surg. adj.  | 61% Pab-1801       |          | 0.99      | *****     |
| 231 | yamaguchi p |    | 1992 | 76                | 76              | colorectal | IHC    | FFS           | post surg. adj.  | 55% Pab-1801       |          | 0.99      | *****     |
| 235 | yamamura p  |    | 1999 | 144               | 144             | colorectal | IHC    | survival      | post surg. adj.  | 50% CM-1           |          | 0.1       | *****     |
| 233 | yamamura p  |    | 1999 | 144               | 144             | colorectal | IHC    | FFS           | post surg. adj.  | 50% CM-1           |          | 0.1       | *****     |
| 234 | yamamura p  |    | 1999 | 142               | 142             | colorectal | IHC    | FFS           | post surg. adj.  | 50% CM-1           |          | 0.2       | *****     |
| 236 | yang        | p  | 2001 | 35                | 35              | colorectal | mut    | survival      | advanced / mets. | 66% *****          | *****    |           | 5         |
| 238 | yoshikawa p |    | 2002 | 63                | 63              | rectum     | IHC    | local control | post surg. adj.  | 49% DO-7           |          | 0.01      | *****     |
| 237 | yoshikawa p |    | 2002 | 63                | 63              | rectum     | IHC    | metastases    | post surg. adj.  | 51% DO-7           |          | 0.01      | *****     |
| 72  | zeng        | p  | 1994 | 107               | 107             | colorectal | IHC    | survival      | post surg. adj.  | 47% Pab-1801       |          | 0.01      | *****     |
| 63  | zeng        | p  | 1994 | 107               | 107             | colorectal | IHC    | FFS           | post surg. adj.  | 47% Pab-1801       |          | 0.01      | *****     |
| 239 | zeng        | p  | 1994 | 107               | 107             | colorectal | IHC    | local control | post surg. adj.  | 47% Pab-1801       |          | 0.01      | *****     |
| 240 | zhang       | p  | 1999 | 235               | 245             | colorectal | IHC    | survival      | post surg. adj.  | 62% multiple       |          | 0.01      | *****     |
| 245 | zirbes      | p  | 2000 | 294               | 294             | colorectal | IHC    | survival      | post surg. adj.  | 68% other          |          | 0.5       | *****     |



| study       | pa | year | to exon | exons | time-<br>point | median<br>fup | design        | Chemo | city region | country     |
|-------------|----|------|---------|-------|----------------|---------------|---------------|-------|-------------|-------------|
| adell       | p  | 1999 | *****   | ***** | 6              | 5.25          | retro. cohort | 0%    | linkoping   | sweden      |
| adell       | p  | 1999 | *****   | ***** | 8              | 5.25          | retro. cohort | 0%    | linkoping   | sweden      |
| adell       | p  | 1999 | *****   | ***** | 8              | 5.25          | retro. cohort | 0%    | linkoping   | sweden      |
| adrover     | p  | 1999 | *****   | ***** | 5              | 5             | retro. cohort | 13%   | madrid      | spain       |
| ahnen       | p  | 1998 | *****   | ***** | 14             | 8             | retro sel.    | 47%   | swog        | usa         |
| allegra     | p  | 2003 | *****   | ***** | 5              | 5             | retro sel.    | 62%   | nsabp       | usa         |
| allegra     | p  | 2002 | *****   | ***** | 6              | 5             | retro sel.    | 68%   | ncctg       | usa         |
| allegra     | p  | 2003 | *****   | ***** | 5              | 5             | retro sel.    | 62%   | nsabp       | usa         |
| aoki        | p  | 2002 | 8       | 4     | 8              |               | retro sel.    | .     | tokyo       | japan       |
| auvinenen   | p  | 1994 | *****   | ***** | 7              |               | retro. cohort | .     | tampere     | finland     |
| backus      | p  | 2001 | *****   | ***** | 5              |               | prosp.cohort  | 100%  | amsterdam   | netherlands |
| backus      | p  | 2001 | *****   | ***** |                |               | prosp.cohort  | 100%  | amsterdam   | netherlands |
| baretton    | p  | 1996 | *****   | ***** | 5              |               | retro. unsel. | .     | munich      | germany     |
| bartik      | p  | 1997 | *****   | ***** | 8              |               | retro. cohort | .     | linkoping   | sweden      |
| bell        | p  | 1993 | *****   | ***** | 5              | 2.8           | prosp.cohort  | .     | leeds       | uk          |
| belluco     | p  | 1996 | *****   | ***** | 3              | 1.85          | prosp.cohort  | 100%  | mski        | usa         |
| belluco     | p  | 1996 | *****   | ***** |                | 1.85          | prosp.cohort  | 100%  | mski        | usa         |
| benhattar   | p  | 1996 | 8       | 4     | 5              |               | prosp.cohort  | 100%  | lausanne    | switzerland |
| berglund    | p  | 2002 | *****   | ***** |                |               | retro. cohort | 100%  | upsala      | sweden      |
| bhatavdekar | p  | 1997 | *****   | ***** | 2              | 2.5           | retro sel.    | .     | ahmedabad   | india       |
| bleeker     | p  | 2001 | 8       | 4     | 5              | 4             | prosp.cohort  | 100%  | groningen   | netherlands |
| borreson-d  | p  | 1998 | 8       | 4     | 8              | 4.7           | prosp.cohort  | 0%    | oslo        | norway      |
| bosari      | p  | 1995 | 8       | 4     | 7              |               | retro. cohort | .     | burlington  | usa         |
| bosari      | p  | 1994 | *****   | ***** | 7              |               | retro. cohort | .     | burlington  | usa         |
| bouzoureni  | p  | 2000 | 8       | 4     |                | 5.5           | retro. cohort | .     | lausanne    | switzerland |
| bouzoureni  | p  | 2000 | *****   | ***** | 6              | 5.5           | retro. cohort | .     | lausanne    | switzerland |
| brett       | p  | 1996 | *****   | ***** |                |               | prosp.cohort  | 100%  | liverpool   | uk          |
| buglioni    | p  | 2001 | *****   | ***** | 5              |               | retro. cohort | 38%   | rome        | italy       |
| buglioni    | p  | 1999 | *****   | ***** | 5              |               | retro. cohort | .     | rome        | italy       |
| buglioni    | p  | 2001 | *****   | ***** | 5              |               | retro. cohort | 38%   | rome        | italy       |
| buglioni    | p  | 1999 | *****   | ***** | 5              |               | retro. cohort | .     | rome        | italy       |
| bukholm     | p  | 2000 | *****   | ***** |                | 4             | retro. cohort | .     | nordbyhagen | norway      |

| study       | pa | year | to exon | exons | time-<br>point | median<br>fup | design            | Chemo | city region | country   |
|-------------|----|------|---------|-------|----------------|---------------|-------------------|-------|-------------|-----------|
| bukholm     | p  | 2000 | *****   | ***** |                |               | 4 retro. cohort   | .     | nordbyhagen | norway    |
| caldes      | p  | 1998 |         | 9     | 5              | 3             | 4 prosp.cohort    | .     | madrid      | spain     |
| caldes      | p  | 1998 | *****   | ***** |                | 3             | 4 prosp.cohort    | .     | madrid      | spain     |
| cascinu     | p  | 2000 | *****   | ***** |                |               | retro. cohort     | 100%  | parma       | italy     |
| cascinu     | p  | 2002 | *****   | ***** |                | 4             | retro. cohort     | 100%  | parma       | italy     |
| chen        | p  | 1997 | *****   | ***** |                |               | 2 retro. cohort   | 14%   | minnesota   | usa       |
| chen        | p  | 1997 | *****   | ***** |                |               | 2 retro. cohort   | .     | minnesota   | usa       |
| chen        | p  | 1997 | *****   | ***** |                |               | 2 retro. cohort   | .     | minnesota   | usa       |
| clarke      | p  | 1999 | *****   | ***** |                | 5             | 5 retro. cohort   | .     | dublin      | ireland   |
| costa       | p  | 1997 | *****   | ***** |                | 4             | prosp.cohort      | 0%    | milan       | italy     |
| desai       | p  | 1996 | *****   | ***** |                |               | retro. cohort     | 22%   | st louis    | usa       |
| desai       | p  | 1996 | *****   | ***** |                |               | retro. cohort     | 22%   | st louis    | usa       |
| diez        | p  | 1997 | *****   | ***** |                |               | 1.8 retro. cohort | 0%    | madrid      | spain     |
| diez        | p  | 1997 | *****   | ***** |                |               | 1.8 retro. cohort | 81%   | madrid      | spain     |
| diez        | p  |      | *****   | ***** |                | 5             | 2.5 retro. cohort | .     | madrid      | spain     |
| diez        | p  |      | *****   | ***** |                | 5             | 2.5 retro. cohort | .     | madrid      | spain     |
| diez        | p  | 2000 | *****   | ***** |                |               | 2.3 retro. cohort | .     | madrid      | spain     |
| diez        | p  | 1995 | *****   | ***** |                | 5             | retro. cohort     | .     | madrid      | spain     |
| diez        | p  |      | *****   | ***** |                | 5             | 2.5 retro. cohort | .     | madrid      | spain     |
| dominguez a |    | 1994 | *****   | ***** |                |               | retro. cohort     | .     | asturias    | spain     |
| edler       | p  | 2000 | *****   | ***** |                |               | 8 retro. cohort   | 0%    | stockholm   | sweden    |
| edler       | p  | 2000 | *****   | ***** |                |               | 8 retro. cohort   | 0%    | stockholm   | sweden    |
| elsaleh     | p  | 2000 |         | 8     | 4              |               | retro. cohort     | 100%  | nedlands    | australia |
| elsaleh     | p  | 2000 |         |       | 1              |               | retro. cohort     | 100%  | nedlands    | australia |
| elsaleh     | p  | 1999 |         | 8     | 4              | 5             | 4.8 retro. cohort | 29%   | nedlands    | australia |
| elsaleh     | p  | 2000 | *****   | ***** |                |               | retro. cohort     | 100%  | nedlands    | australia |
| elsaleh     | p  | 1999 | *****   | ***** |                | 5             | 4.8 retro. cohort | 29%   | nedlands    | australia |
| esposito    | p  | 2001 | *****   | ***** |                |               | prosp.cohort      | 100%  | padova      | italy     |
| etienne     | p  | 2002 |         | 9     | 6              | 4             | prosp.cohort      | 100%  | nice        | france    |
| fante       | p  | 1996 | *****   | ***** |                | 5             | retro. cohort     | .     | modena      | italy     |
| finkelstein | p  | 1996 |         | 8     | 4              | 5             | 7 retro. cohort   | 100%  | pittsburgh  | usa       |
| flamini     | p  | 1996 | *****   | ***** |                | 4             | 3 retro. cohort   | .     | rome        | italy     |

| study      | pa | year | to exon | exons | time-<br>point | median<br>fup | design             | Chemo | city region | country     |
|------------|----|------|---------|-------|----------------|---------------|--------------------|-------|-------------|-------------|
| fraczadi   | p  | 2003 | *****   | ***** | 2              |               | 1.5 retro. cohort  | 100%  | budapest    | hungary     |
| fu         | p  | 1998 | *****   | ***** |                |               | 4.5 retro. cohort  | 0%    | tokyo       | japan       |
| fu         | p  | 1998 | *****   | ***** |                |               | 4.5 retro. cohort  | 0%    | tokyo       | japan       |
| gallego    | p  | 2000 | *****   | ***** | 5              |               | 5 retro. cohort    | 0%    | madrid      | spain       |
| gallego    | p  | 2000 | *****   | ***** | 5              |               | 5 retro. cohort    | 0%    | madrid      | spain       |
| garrity    | p  | 2004 | *****   | ***** | 5              |               | 8 retro. sel.      | 0%    | minnesota   | usa         |
| garrity    | p  | 2004 | *****   | ***** | 5              |               | 8 retro. sel.      | 0%    | minnesota   | usa         |
| gervaz     | p  | 2001 | 8       | 4     |                |               | 5.5 retro. cohort  | 0%    | lausanne    | switzerland |
| gervaz     | p  | 2001 | *****   | ***** | 6              |               | 5.5 retro. cohort  | 0%    | lausanne    | switzerland |
| gervaz     | p  | 2002 | *****   | ***** | 6              |               | 5.5 retro. cohort  | 0%    | lausanne    | switzerland |
| giatomanc  | p  | 1999 | *****   | ***** | 3              |               | 2.3 retro. cohort  | 48%   | athens      | greece      |
| giatomanc  | p  | 2001 | *****   | ***** |                |               | 2.6 retro. cohort  | 40%   | athens      | greece      |
| giatomanc  | p  | 1999 | *****   | ***** |                |               | 2.3 retro. cohort  | 48%   | athens      | greece      |
| giatomanc  | p  | 2001 | *****   | ***** |                |               | 2.6 retro. cohort  | .     | athens      | greece      |
| giatomanc  | p  | 2001 | *****   | ***** |                |               | 2.6 retro. cohort  | 40%   | athens      | greece      |
| giatomanc  | p  | 2001 | *****   | ***** |                |               | 2.6 retro. cohort  | .     | athens      | greece      |
| goh        | p  | 1999 | 9       | 6     |                |               | 3.5 retro. cohort  | .     | singapore   | singapore   |
| goh        | p  | 1999 | 9       | 6     |                |               | 3.5 retro. cohort  | .     | singapore   | singapore   |
| goh        | p  | 1999 | 9       | 6     |                |               | 3.5 retro. cohort  | .     | singapore   | singapore   |
| gonzalez-a | p  | 2004 |         |       | 5              |               | retro. cohort      | .     | madrid      | spain       |
| grewal     | p  | 1995 | *****   | ***** | 7              |               | 3.2 retro. cohort  | 0%    | new york    | usa         |
| grewal     | p  | 1995 | *****   | ***** |                |               | 3.2 retro. cohort  | 0%    | new york    | usa         |
| gunther    | p  | 2002 | *****   | ***** |                |               | 7 retro sel.       | 0%    | erlangen    | germany     |
| hallak     | p  | 1998 | *****   | ***** |                |               | retro. cohort      | .     | ulm         | germany     |
| hamelin    | p  | 1994 | 8       | 4     | 6              |               | 4 retro. cohort    | 0%    | paris       | france      |
| hardinghan | p  | 1998 | 8       | 4     | 5              |               | retro. cohort      | .     | woodville   | australia   |
| haseba     | p  | 2003 | 9       | 5     | 4              |               | 2.75 retro. cohort | 44%   | nagasaki    | japan       |
| hayashi    | p  | 1995 | 8       | 4     |                |               | retro. cohort      | .     | tokyo       | japan       |
| heisterkam | p  | 1999 | *****   | ***** | 5              |               | retro. cohort      | .     | rotterdam   | netherlands |
| hirano     | p  | 2000 | *****   | ***** |                |               | 4.2 retro. cohort  | .     | kanazawa    | japan       |
| hirvikoski | p  | 1999 | 8       | 5     |                |               | 2.8 retro sel.     | .     | kuopio      | finland     |
| hirvikoski | p  | 1999 | *****   | ***** |                |               | 2.8 retro sel.     | .     | kuopio      | finland     |

| study      | pa | year | to exon | exons | time-<br>point | median<br>fup | design            | Chemo | city region | country     |
|------------|----|------|---------|-------|----------------|---------------|-------------------|-------|-------------|-------------|
| hirvikoski | p  | 1999 | *****   | ***** |                |               | 2.8 retro sel.    | .     | kuopio      | finland     |
| ichikawa   | p  | 1996 |         | 9     | 5              |               | retro sel.        | 100%  | kyoto       | japan       |
| ilyas      | p  | 1998 | *****   | ***** |                |               | 6 retro sel.      | .     | london      | uk          |
| iniesta    | p  | 1998 |         | 9     | 5              | 4             | retro. cohort     | .     | madrid      | spain       |
| jansson    | p  | 2001 |         | 9     | 5              |               | 10 retro. cohort  | .     | linkoping   | sweden      |
| jingwei    | a  | 1998 | *****   | ***** |                |               | retro sel.        | .     | wuhan       | china       |
| kahlenberg | p  | 2000 |         | 9     | 5              | 5             | prosp.cohort      | .     | san antonic | usa         |
| kahlenberg | p  | 2000 |         | 9     | 5              | 5             | prosp.cohort      | .     | san antonic | usa         |
| kandolier  | p  | 2002 |         | 10    | 9              | 4             | prosp.cohort      | 23%   | vienna      | austria     |
| kandolier  | p  | 2002 |         | 10    | 9              |               | prosp.cohort      | 23%   | vienna      | austria     |
| kandolier  | p  | 2002 |         | 10    | 9              |               | prosp.cohort      | 23%   | vienna      | austria     |
| kandolier  | p  | 2002 |         | 10    | 9              |               | prosp.cohort      | 23%   | vienna      | austria     |
| kang       | p  | 1997 | *****   | ***** |                | 5             | 5 retro. cohort   | .     | osaka       | japan       |
| kang       | p  | 1997 | *****   | ***** |                | 5             | 5 retro. cohort   | .     | osaka       | japan       |
| kapiteijn  | p  | 2001 | *****   | ***** |                | 4             | retro sel.        | .     | leiden      | netherlands |
| kapiteijn  | p  | 2001 | *****   | ***** |                | 4             | retro sel.        | .     | leiden      | netherlands |
| khan       | p  | 2001 |         | 9     | 6              |               | 1 prosp.cohort    | 100%  | london      | uk          |
| kim        | p  | 2001 | *****   | ***** |                |               | prosp.cohort      | 100%  | seoul       | korea       |
| kim        | p  | 1995 | *****   | ***** |                | 5             | retro. cohort     | .     | seoul       | korea       |
| klump      | p  | 2003 | *****   | ***** |                | 8             | 3.9 retro. cohort | 0%    | dusseldorf  | germany     |
| klump      | p  | 2003 | *****   | ***** |                | 8             | 3.9 retro. cohort | 0%    | dusseldorf  | germany     |
| klump      | p  | 2003 | *****   | ***** |                | 8             | 3.9 retro. cohort | 0%    | dusseldorf  | germany     |
| kotera     | p  | 1997 | *****   | ***** |                | 8             | retro. cohort     | .     | hyogo       | japan       |
| kotera     | p  | 1997 | *****   | ***** |                | 8             | retro. cohort     | .     | hyogo       | japan       |
| kressner   | p  | 1999 |         | 11    | 11             | 8             | prosp.cohort      | 0%    | uppsala     | sweden      |
| kressner   | p  | 1999 | *****   | ***** |                | 8             | prosp.cohort      | 0%    | uppsala     | sweden      |
| kressner   | p  | 1996 | *****   | ***** |                | 8             | retro. cohort     | 0%    | uppsala     | sweden      |
| kressner   | p  | 1996 | *****   | ***** |                |               | retro. cohort     | 0%    | uppsala     | sweden      |
| lanza      | p  | 1996 | *****   | ***** |                | 3             | 2.5 retro. cohort | 24%   | ferrara     | italy       |
| lashner    | p  | 2003 | *****   | ***** |                | 10            | retro. cohort     | .     | cleveland   | usa         |
| lazaris    | p  | 1995 | *****   | ***** |                |               | retro. cohort     | .     | athens      | greece      |
| leahy      | p  | 1996 |         | 8     | 4              | 5             | retro. cohort     | 0%    | dublin      | ireland     |

| study       | pa | year | to exon | exons | time-<br>point | median<br>fup | design        | Chemo | city region | country     |
|-------------|----|------|---------|-------|----------------|---------------|---------------|-------|-------------|-------------|
| leahy       | p  | 1996 | *****   | ***** | 5              | 10            | retro. cohort | 0%    | dublin      | ireland     |
| lenz        | p  |      |         | 11    | 8              | 2             | prosp.cohort  | 100%  | los angeles | usa         |
| lenz        | p  | 1998 | *****   | ***** | 1              |               | retro. cohort | 0%    | los angeles | usa         |
| lenz        | p  | 1998 | *****   | ***** |                |               | retro. cohort | 0%    | los angeles | usa         |
| liang       | p  | 1999 |         | 11    | 10             | 7             | retro. cohort | 100%  | taipei      | taiwan      |
| liang       | p  | 1999 | *****   | ***** |                |               | retro. cohort | 100%  | taipei      | taiwan      |
| luna-perez  | p  | 1998 | *****   | ***** |                |               | retro. cohort | 100%  | mexico city | mexico      |
| maeda       | p  | 1997 | *****   | ***** | 5              | 5             | retro. cohort | .     | osaka       | japan       |
| manne       | p  | 1997 | *****   | ***** | 10             |               | retro sel.    | .     | birmingham  | usa         |
| manne       | p  | 1998 | *****   | ***** | 10             | 4             | retro sel.    | .     | birmingham  | usa         |
| morrin      | p  | 1994 | *****   | ***** | 5              | 5             | retro. cohort | .     | limerick    | ireland     |
| mulder      | p  | 1995 | *****   | ***** | 10             |               | retro. cohort | .     | leiden      | netherlands |
| nasierowski | p  | 2001 | *****   | ***** |                |               | retro. cohort | 0%    | warsaw      | poland      |
| nathanson   | p  | 1994 | *****   | ***** | 7              |               | retro. cohort | 0%    | detroit     | usa         |
| nehls       | p  | 1999 | *****   | ***** | 10             | 6             | retro. cohort | .     | dusseldorf  | germany     |
| nitti       | p  | 1998 | *****   | ***** | 4              | 3             | prosp.cohort  | 26%   | padova      | italy       |
| offner      | p  | 1995 | *****   | ***** | 10             | 7.9           | retro. cohort | 0%    | munster     | germany     |
| ogiwara     | p  | 1994 | *****   | ***** |                |               | retro. cohort | .     | hamamatsi   | japan       |
| ogiwara     | p  | 1994 | *****   | ***** |                |               | retro. cohort | .     | hamamatsi   | japan       |
| okonkwo     | p  | 2001 | *****   | ***** |                |               | retro. cohort | 100%  | chicago     | usa         |
| okubo       | p  | 2001 |         | 11    | 10             | 5             | prosp.cohort  | .     | tokyo       | japan       |
| okubo       | p  | 2001 | *****   | ***** | 5              |               | prosp.cohort  | .     | tokyo       | japan       |
| paradiso    | p  | 2002 | *****   | ***** |                |               | retro. cohort | 94%   | neuquen     | argentina   |
| paradiso    | p  | 2002 | *****   | ***** |                |               | retro. cohort | 94%   | neuquen     | argentina   |
| paradiso    | p  | 2000 | *****   | ***** |                |               | retro. cohort | 100%  | neuquen     | argentina   |
| pereira     | p  | 1997 | *****   | ***** |                | 5             | retro. cohort | 0%    | lisbon      | portugal    |
| pocard      | c  | 1998 | *****   | ***** |                |               | retro. cohort | .     | paris       | france      |
| poller      | p  | 1997 | *****   | ***** | 5              | 5             | retro. cohort | .     | gloucester  | uk          |
| poller      | p  | 1997 | *****   | ***** |                | 5             | retro. cohort | .     | gloucester  | uk          |
| pricolo     | p  | 1996 |         | 8     | 4              | 7             | retro. cohort | 100%  | providence  | usa         |
| pricolo     | p  | 1997 |         | 8     | 4              | 7             | retro. cohort | 50%   | providence  | usa         |
| qiu         | p  | 2000 | *****   | ***** |                |               | retro. cohort | 71%   | minnesota   | usa         |

| study      | pa | year | to exon | exons | time-<br>point | median<br>fup | design        | Chemo | city region | country   |
|------------|----|------|---------|-------|----------------|---------------|---------------|-------|-------------|-----------|
| qiu        | p  | 2000 | *****   | ***** |                |               | retro. cohort | 71%   | minnesota   | usa       |
| qiu        | p  | 2000 | *****   | ***** |                |               | retro. cohort | 71%   | minnesota   | usa       |
| rau        | p  | 2003 | 8       | 4     | 3              |               | prosp.cohort  | 100%  | berlin      | germany   |
| rau        | p  | 2003 | *****   | ***** | 3              |               | prosp.cohort  | 100%  | berlin      | germany   |
| rebischung | p  | 2002 | 11      | 10    | 5              | 4             | prosp.cohort  | 0%    | lyon        | france    |
| rebischung | p  | 2002 | 11      | 10    |                | 4             | prosp.cohort  | 0%    | lyon        | france    |
| remvikos   | p  | 1992 | *****   | ***** | 5              |               | retro. cohort | .     | paris       | france    |
| remvikos   | p  | 1992 | *****   | ***** | 5              |               | retro. cohort | .     | paris       | france    |
| rew        | p  | 1996 | *****   | ***** | 4              | 2.5           | prosp.cohort  | .     | leicester   | uk        |
| rodel      | p  | 2002 | *****   | ***** |                |               | retro. cohort | 100%  | erlangen    | germany   |
| rodel      | p  | 2002 | *****   | ***** |                | 2.3           | retro. cohort | 100%  | erlangen    | germany   |
| rodel      | p  | 2002 | *****   | ***** |                | 2.3           | retro. cohort | 100%  | erlangen    | germany   |
| rodel      | p  | 2002 | *****   | ***** |                |               | retro. cohort | 100%  | erlangen    | germany   |
| rodel      | p  | 2002 | *****   | ***** |                | 2.3           | retro. cohort | 100%  | erlangen    | germany   |
| rosty      | p  | 2001 | 9       | 6     | 3              |               | prosp.cohort  | 100%  | nice        | france    |
| rosty      | p  | 2001 | 9       | 6     |                |               | prosp.cohort  | 100%  | nice        | france    |
| russo      | p  | 2002 | 8       | 4     | 5              | 6             | prosp.cohort  | 6%    | palermo     | italy     |
| russo      | p  | 2002 | 8       | 4     | 5              | 6             | prosp.cohort  | 6%    | palermo     | italy     |
| russo      | p  | 1998 | 8       | 4     |                |               | prosp.cohort  | .     | palermo     | italy     |
| sakakura   | p  | 1998 | 8       | 5     |                |               | prosp.cohort  | 100%  | kyoto       | japan     |
| samowitz   | p  | 2002 | 8       | 4     |                | 5             | retro. cohort | .     | utah        | usa       |
| saw        | p  | 2003 | 8       | 4     |                | 3.9           | retro. cohort | 45%   | sydney      | australia |
| saw        | p  | 2003 | 8       | 4     |                | 3.9           | retro. cohort | 45%   | sydney      | australia |
| saw        | p  | 2002 | 8       | 4     |                |               | retro. cohort | .     | sydney      | australia |
| saw        | p  | 2003 | *****   | ***** |                | 3.9           | retro. cohort | 45%   | sydney      | australia |
| saw        | p  | 2003 | *****   | ***** |                | 3.9           | retro. cohort | 45%   | sydney      | australia |
| saw        | p  | 2003 | *****   | ***** |                | 3.9           | retro. cohort | 45%   | sydney      | australia |
| saw        | p  | 2002 | *****   | ***** |                |               | retro. cohort | .     | sydney      | australia |
| schelwies  | p  | 2002 | 8       | 4     | 8              | 5             | retro. cohort | 5%    | berlin      | germany   |
| schelwies  | p  | 2002 | 8       | 4     | 8              | 5             | retro. cohort | 5%    | berlin      | germany   |
| schwandne  | p  | 2002 | *****   | ***** |                | 3.2           | retro. cohort | 57%   | lubeck      | germany   |
| schwandne  | p  | 2000 | *****   | ***** | 6              | 3.2           | retro. cohort | 57%   | lubeck      | germany   |

| study      | pa | year | to exon | exons | time-<br>point | median<br>fup | design            | Chemo | city region | country     |
|------------|----|------|---------|-------|----------------|---------------|-------------------|-------|-------------|-------------|
| schwandne  | p  | 2002 | *****   | ***** |                |               | 3.2 retro. cohort | 57%   | lubeck      | germany     |
| schwandne  | p  | 2000 | *****   | ***** |                |               | 3.2 retro. cohort | 57%   | lubeck      | germany     |
| scott      | p  | 1991 | *****   | ***** | 3              |               | prosp.cohort      | .     | leeds       | uk          |
| scott      | p  | 1998 | *****   | ***** |                |               | retro. cohort     | 100%  | stoke       | uk          |
| smith      | p  | 1996 |         |       | 1              | 4             | 2 prosp.cohort    | 0%    | singapore   | singapore   |
| smith      | p  | 1996 | *****   | ***** |                | 4             | 2 prosp.cohort    | 0%    | singapore   | singapore   |
| smith      | p  | 1996 | *****   | ***** |                | 4             | 2 prosp.cohort    | .     | singapore   | singapore   |
| smith      | p  | 2003 | *****   | ***** |                | 5             | 4 retro. cohort   | .     | new york    | usa         |
| smith      | p  | 2003 | *****   | ***** |                | 5             | 4 retro. cohort   | .     | new york    | usa         |
| soong      | p  | 1997 | 8       |       | 4              | 7             | 3 retro. cohort   | 5%    | nedlands    | australia   |
| soong      | p  | 2000 | 1       |       | -2             |               | retro. cohort     | 17%   | nedlands    | australia   |
| soong      | p  | 1997 | *****   | ***** |                | 7             | 3 retro. cohort   | 5%    | nedlands    | australia   |
| sory       | p  | 1997 | *****   | ***** |                |               | retro. cohort     | .     | kanazawa    | japan       |
| spitz      | p  | 1997 | *****   | ***** |                |               | retro. cohort     | 100%  | houston     | usa         |
| starzynska | p  | 1997 | *****   | ***** |                | 5             | 5.5 retro. cohort | 3%    | mancheste   | uk          |
| starzynska | p  | 1992 | *****   | ***** |                |               | 1 retro. cohort   | .     | mancheste   | uk          |
| starzynska | p  | 1997 | *****   | ***** |                | 5             | 5.5 retro. cohort | 3%    | mancheste   | uk          |
| starzynska | p  | 1992 | *****   | ***** |                |               | 1 retro. cohort   | .     | mancheste   | uk          |
| sturm      | p  | 1999 |         |       | -7             | 6             | retro. cohort     | 73%   | berlin      | germany     |
| sturm      | p  | 1999 | *****   | ***** |                | 6             | retro. cohort     | 73%   | berlin      | germany     |
| subramani  | p  | 1995 | *****   | ***** |                |               | 2.3 retro. cohort | .     | hobart      | australia   |
| sun        | p  | 1993 | *****   | ***** |                | 8             | retro. cohort     | .     | linkoping   | sweden      |
| sun        | p  | 1995 | *****   | ***** |                | 8             | retro. cohort     | .     | linkoping   | sweden      |
| sun        | p  | 1997 | *****   | ***** |                | 10            | 10 retro. cohort  | .     | linkoping   | sweden      |
| sun        | p  | 1996 | *****   | ***** |                | 8             | retro. cohort     | .     | linkoping   | sweden      |
| suzuki     | p  | 1994 | *****   | ***** |                | 3             | 2 prosp.cohort    | .     | edobashi    | japan       |
| tollenaar  | p  | 1998 | *****   | ***** |                | 7             | 2 retro. cohort   | 0%    | leiden      | netherlands |
| tomoda     | p  | 1995 | *****   | ***** |                | 2             | 1.5 retro. cohort | 0%    | fukuoka     | japan       |
| tortola    | p  | 1999 | 9       |       | 6              | 5             | 4.3 retro. cohort | 21%   | barcelona   | spain       |
| tullo      | p  | 1999 | 9       |       | 5              |               | 2.3 prosp.cohort  | .     | bari        | italy       |
| wang       | a  | 1998 | *****   | ***** |                |               | retro. cohort     | .     |             | china       |
| watanabe   | p  | 2002 | *****   | ***** |                | 5             | retro. cohort     | 0%    | tokyo       | japan       |

| study      | pa | year | to exon | exons | time-<br>point | median<br>fup | design        | Chemo | city region | country     |
|------------|----|------|---------|-------|----------------|---------------|---------------|-------|-------------|-------------|
| wiggenraac | p  | 1998 | *****   | ***** | 6              | 3.3           | retro. cohort | 0%    | leiden      | netherlands |
| wiggenraac | p  | 1998 | *****   | ***** | 6              | 3.3           | retro. cohort | 0%    | leiden      | netherlands |
| yamaguchi  | p  | 1993 | *****   | ***** | 10             |               | retro. cohort | .     | kanazawa    | japan       |
| yamaguchi  | p  | 1992 | *****   | ***** | 4              |               | retro. cohort | .     | kanazawa    | japan       |
| yamaguchi  | p  | 1992 | *****   | ***** |                |               | retro. cohort | .     | kanazawa    | japan       |
| yamamura   | p  | 1999 | *****   | ***** | 5              |               | retro. cohort | 100%  | kawasaki    | japan       |
| yamamura   | p  | 1999 | *****   | ***** | 5              |               | retro. cohort | 100%  | kawasaki    | japan       |
| yamamura   | p  | 1999 | *****   | ***** |                |               | retro. cohort | .     | kawasaki    | japan       |
| yang       | p  | 2001 | 9       | 5     | 5              |               | prosp.cohort  | 0%    | goteborg    | sweden      |
| yoshikawa  | p  | 2002 | *****   | ***** |                |               | retro. cohort | .     | tsu         | japan       |
| yoshikawa  | p  | 2002 | *****   | ***** |                |               | retro. cohort | .     | tsu         | japan       |
| zeng       | p  | 1994 | *****   | ***** | 6              | 5             | retro. cohort | 19%   | new york    | usa         |
| zeng       | p  | 1994 | *****   | ***** | 6              | 5             | retro. cohort | 19%   | new york    | usa         |
| zeng       | p  | 1994 | *****   | ***** | 6              | 5             | retro. cohort | 19%   | new york    | usa         |
| zhang      | p  | 1999 | *****   | ***** | 8              |               | retro. cohort | .     | linkoping   | sweden      |
| zirbes     | p  | 2000 | *****   | ***** | 10             | 4.7           | retro. cohort | .     | cologne     | germany     |
